# Supplementary material for: A heptanuclear {Dy2Cu5} complex as a single-molecule magnet
Source: Royal Society of Chemistry journal article supplement (doi:10.1039/d3dt03811d), 2024-01-01
Supplement: d3dt03811d1.pdf [file d3dt03811d1.pdf]

## Heptanuclear {Dy<sub>2</sub>Cu<sub>5</sub>} complex as a single-molecule magnet

Romana Mičová, Cyril Rajnák, Ján Titiš, Ján Moncol', Jana Nováčiková, Alina Bieňko and Roman Boča

### Supporting information (SI)

**Physical measurements.** <sup>1</sup>H NMR and <sup>13</sup>C NMR spectra were recorded for the samples dissolved in DMSO-*d*<sub>6</sub> at 600 MHz for <sup>1</sup>H NMR and 150 MHz for <sup>13</sup>C NMR by a Varian VNMRS 600 MHz instrument. Elemental analyses were measured by Flash 2000 CHNS apparatus (Thermo Scientific). The samples for FT-IR (ATR) measurements were not dried prior to its using and were used as freshly growth crystals. FT-IR spectra were measured by ATR method in region 400 – 4000 cm<sup>-1</sup> at room temperature FT-IR spectrometer (Shimadzu IRAffinity-1) with the Quest ATR holder. Absorption spectra of H<sub>3</sub>L<sup>1</sup> in the UV–Vis region (9000–50 000 cm<sup>-1</sup>) were recorded by UV–Vis–NIR spectrophotometer 50 Bio (Varian). UV-Vis spectra for solid sample (1) was dispersed in the Nujol oil were measured by Specord 250 Plus (Analytica Jena) with the DAD detector. Melting points were studied with thermo-microscopy by Kofler hot-stage microscope at 4°C·min<sup>-1</sup> and reported without corrections.

**X-ray crystal structure determination.** data collection and cell refinement of suitable single crystal of 1 were made by Stoe StadiVari diffractometer using PILATUS3R 300K HPAD detector and micro-focused source Xenocs Genix3D with Cu HF at 100K. Corrections to Lorentz, polarization and multi-scan absorption effects were applied. The structure was solved by charge-flipping method and refined anisotropically by common least-squares methods. The programs ShelXT, Superflip ShelXL, OLEX2 and MERCURY have been used for structure determination, refinement and drawing.<sup>S1-S5</sup> The hydrogen atoms were refined with fixed distances from the parent carbon atoms. Crystal data are presented in Table S1 in detail.

### Details on the synthesis/analysis

The organic reactants (2-hydroxy-1,3-propandiamine, 5-bromo-3-methoxysalicylaldehyde, 5-chloro-3-methoxysalicylaldehyde and inorganic salts (dysprosium(III) chloride hexahydrate, copper(II) nitrate trihydrate) of reagent grade were used as received. Ethanol, methanol and triethylamine were not dried and used without any further purification.

**Synthesis and analytical data of H<sub>3</sub>L<sup>1</sup>.** 2-hydroxy-1,3-propandiamine (1 mmol, 0.901 g) was dissolved in ethanol (15 cm<sup>3</sup>) and 5-bromo-3-methoxysalicyl-aldehyde (2 mmol, 0.462 g) was added gradually. The resulting solution was stirred and heated under reflux for 3 h at 60° C. A yellow powder was immediately obtained, filtered and dried. Recipe was based on same manner to that describe from S.-P. Yan et al.<sup>S6</sup> Yield: 86 %. Melting point: 180-185 °C. *Anal Calc.* for C<sub>19</sub>H<sub>20</sub>Br<sub>2</sub>N<sub>2</sub>O<sub>5</sub> (*M* = 516.19 g·mol<sup>-1</sup>): C, 44.21; H, 3.91; N, 5.43. *Found:* C, 43.61; H, 3.89; N, 5.60. <sup>1</sup>H NMR (600 MHz, DMSO-*d*<sub>6</sub>, 25 °C) δ (ppm) 13.76 (bs, OH, 2H), 8.46 (s, -CH=N-, 2H), 7.22 (d, *J* = 2.3 Hz, H-6', 2H), 7.08 (d, *J* = 2.3 Hz, H-4', 2H), 5.36 (bs, OH, 1H), 4.02-3.97 (m, H-2, 1H), 3.78 (s, OCH<sub>3</sub>, 6H), 3.77 (ddd, *J* = 12.5, 4.2, 0.9 Hz, H-1, H-3, 2H), 3.58 (ddd, *J* = 12.5, 6.8, 0.7 Hz, H-1, H-3, 2H); <sup>13</sup>C NMR (150 MHz, DMSO-*d*<sub>6</sub>, 25 °C) δ (ppm) 166.0 (-CH=N-), 154.0 (C-2'), 149.9 (C-3'), 124.8 (C-6'), 118.5 (C-1'), 116.8 (C-4'), 107.2 (C-5'), 68.9 (C-2), 60.9 (C-1, C-3), 56.0 (OCH<sub>3</sub>). Selected IR bands: 3027(w), 3066(w), 2897(w), 2850(w), 1629(s), 1519(s), 1479(s), 1436(s), 1370(m), 1353(m), 1230(s), 1213(sh), 1092(m), 1075(m), 1016(m), 988(m), 962(m), 864(m), 835(s), 760(m), 696(m), 638(m), 578(m), 565(m), 491(sh), 420(m) (s = strong). UV/Vis (EtOH) *v*<sub>max</sub>/10<sup>3</sup> cm<sup>-1</sup> (*c* = 1.94·10<sup>-5</sup> mol·dm<sup>3</sup>): 23.50 (0.097; ε = 5007 M<sup>-1</sup>·cm<sup>-1</sup>); 29.28 (0.084; ε = 4336 M<sup>-1</sup>·cm<sup>-1</sup>); 34.02 (0.182; ε = 9395 M<sup>-1</sup>·cm<sup>-1</sup>); 43.53 (0.920; ε = 47489 M<sup>-1</sup>·cm<sup>-1</sup>).

**Synthesis and analytical data of [(H<sub>2</sub>O)<sub>6</sub>Dy<sup>III</sup>(μ<sub>2</sub>-L<sup>1</sup>)<sub>2</sub>(μ<sub>3</sub>-O)<sub>4</sub>Cu<sup>II</sup><sub>5</sub>(μ<sub>2</sub>-Cl)<sub>2</sub>], 1.** H<sub>3</sub>L<sup>1</sup> (1 mmol, 0.179 g) was dissolved in methanol (15 cm<sup>3</sup>) and triethylamine was added (2 mmol 140 cm<sup>3</sup>). The solution was stirred for 20 min, while in the second beaker, copper(II) nitrate trihydrate (1 mmol, 0.121 g) was dissolved in methanol (9.2 cm<sup>3</sup>). Finally, the two solutions were combined and stirred for 20 min before dysprosium(III) chloride hexahydrate was added. The resulting mixture was stirred at room temperature for two hours, filtered and allowed to crystallize. Green crystals were collected after 5 days. Yield: 2.1%. Melting point: > 300°C. *Anal Calc.* for C<sub>38</sub>H<sub>46</sub>Br<sub>4</sub>Cl<sub>2</sub>Cu<sub>5</sub>Dy<sub>2</sub>N<sub>4</sub>O<sub>20</sub> (*M* = 1912.03 g·mol<sup>-1</sup>): C, 23.87; H, 2.42; N, 2.93. *Found:* C, 22.87; H, 3.53; N, 3.89. UV/Vis (Nujol) *v*<sub>max</sub>/10<sup>3</sup> cm<sup>-1</sup> (relat. absorb.): 15.39 (0.257); 27.58 (0.748); 35.96 (0.874).

## Heptanuclear {Dy<sub>2</sub>Cu<sub>5</sub>} complex as a single-molecule magnet

Romana Mičová, Cyril Rajnák, Ján Titiš, Ján Moncol', Jana Nováčiková, Alina Bieňko and Roman Boča

- S1 G. M. Sheldrick, *Acta Crystallogr.*, 2015, **A71**, 3  
 S2 L. Palatinus, G. Chapuis, *J. Appl. Cryst.*, 2007, **40**, 786.  
 S3 G.M. Sheldrick. *Acta Crystallogr.*, 2015, **C71**, 3.  
 S4 O. V. Dolomanov, L. J. Bourhis, R. J. Gildea, J. A. K. Howard, H. Puschmann, *J. Appl. Cryst.*, 2009, **42**, 339.  
 S5 C. F. Macrae, I. J. Bruno, J. A. Chisholm, P. R. Edgington, P. McCabe, E. Pidcock, L., Rodriguez-Monge, R. Taylor, J. V.D. Streek, P. A. Wood, *J. App. Crystallogr.*, 2008, **41**, 466.  
 S6 L. Jiang, D.-Y. Zhang, J.-J. Suo, W. Gu, J.-L. Tian, X. Liu, S.-P. Yan, *Dalton Trans.*, 2016, **45**, 10233

**Quantum-chemical calculations.** Density functional theory (DFT) calculations were performed with ORCA 5.0.4 computational package at the experimental geometry of complex **1** established by the X-ray diffraction [S7]. However, the structure was truncated as needed or otherwise modified to make the calculations more efficient. The relativistic effects were included in the calculations with the second-order Douglas-Kroll-Hess (DKH) approximation [S8]. All calculations included SARC-DKH-TZVP (for Dy) and DKH-def2-TZVP (for all other elements) basis sets and utilized the RIJCOSX approximation with the AutoAux generation procedure [S9]. Increased integration grids (DefGrid2, for Dy the SpecialGrid option was set to 8) and tight SCF convergence criteria were also used. Calculation of the electronic structure and the exchange coupling constant  $J$  were based on B3LYP functional [S10]. The  $J$  values have been calculated using the broken-symmetry solution for low-spin wave function [S11]. The time-dependent DFT method was used to model the electronic spectra of individual metal centers using the  $\omega$ B97X-D3 functional [S12].

[S7] (a) F. Neese, (2012) The ORCA program system, Wiley Interdiscip. Rev.: *Comput. Mol. Sci.*, **2**, 73. (b) Neese, F. (2017) Software update: the ORCA program system, version 4.0, Wiley Interdiscip. Rev.: *Comput. Mol. Sci.*, **8**, e1327. (c) F. Neese, F. Wennmohs, U. Becker, C. Riplinger, (2020) The ORCA quantum chemistry program package, *J. Chem. Phys.*, **152**, 224108.

[S8] M. Reiher, Douglas–Kroll–Hess Theory: a relativistic electrons-only theory for chemistry. *Theor. Chem. Acc.*, 2006, **116**, 241.

[S9] G. L. Stoychev, A. A. Auer, F. Neese, *J. Chem. Theory Comput.*, 2017, **13**, 554.

[S10] (a) A. D. Becke, *Phys. Rev. A.*, 1988, **38**, 3098. (b) C. Lee; W. Yang; R. G. Parr, *Phys. Rev. B.*, 1988, **37**, 785.

[S11] (a) G. David, F. Wennmohs, F. Neese, N. Ferre, *Inorg. Chem.*, 2018, **57**, 12769. (b) D. A. Pantazis, V. Krewald, M. Orto, F. Neese, *Dalton Trans.*, 2010, **39**, 4959.

[S12] T. Risthaus, A. Hansen, S. Grimme, *Phys. Chem. Chem. Phys.*, 2014, **16**, 14408 .

Heptanuclear  $\{\text{Dy}_2\text{Cu}_5\}$  complex as a single-molecule magnet

Romana Mičová, Cyril Rajnák, Ján Titiš, Ján Moncol', Jana Nováčiková, Alina Bieňko and Roman Boča

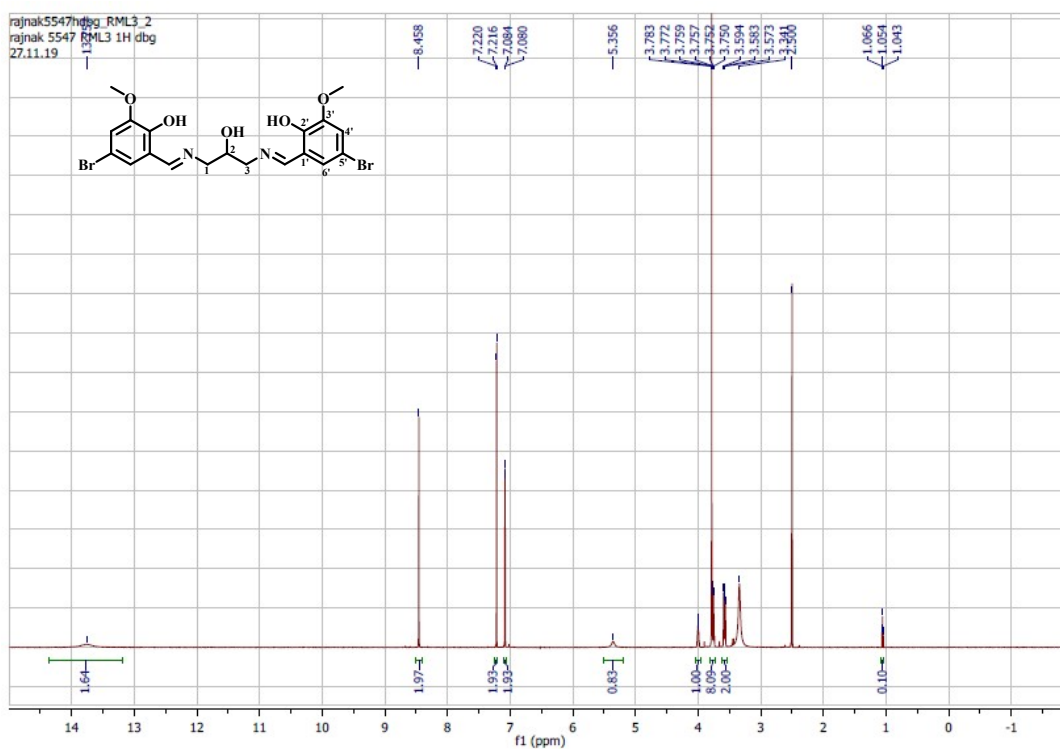Fig. S1.  $^1\text{H}$  NMR spectrum of ligand  $\text{H}_3\text{L}^1$ .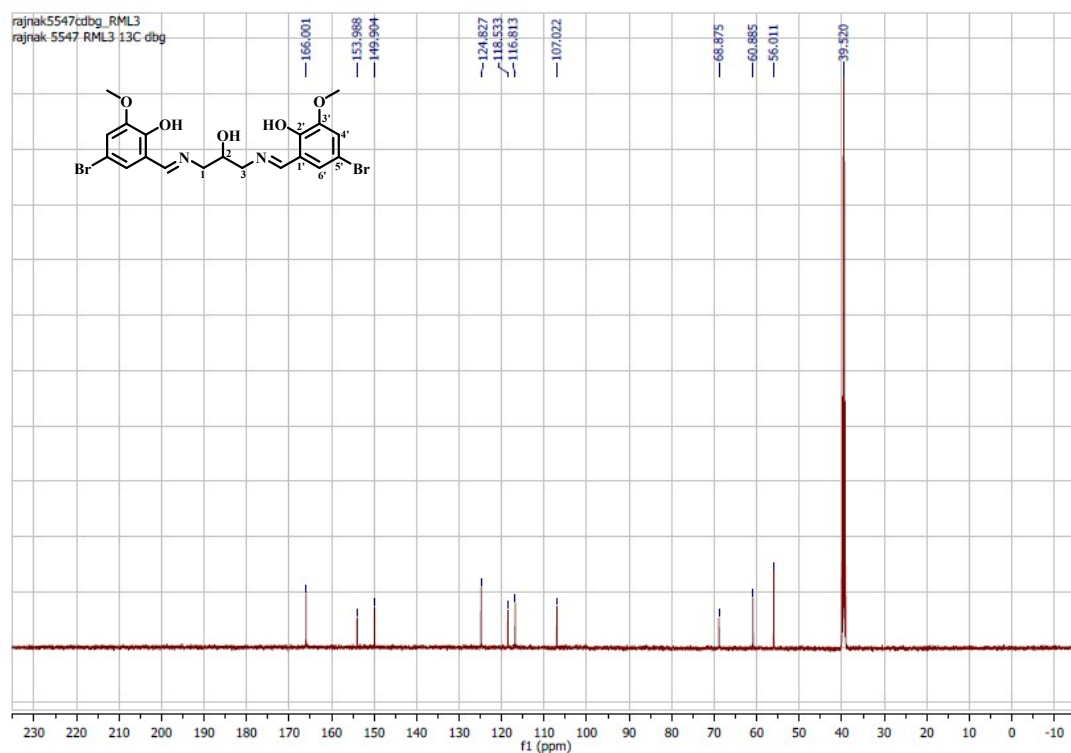Fig. S2.  $^{13}\text{C}$  NMR spectrum of ligand  $\text{H}_3\text{L}^1$ .

## Heptanuclear $\{\text{Dy}_2\text{Cu}_5\}$ complex as a single-molecule magnet

Romana Mičová, Cyril Rajnák, Ján Titiš, Ján Moncol', Jana Nováčiková, Alina Bieňko and Roman Boča

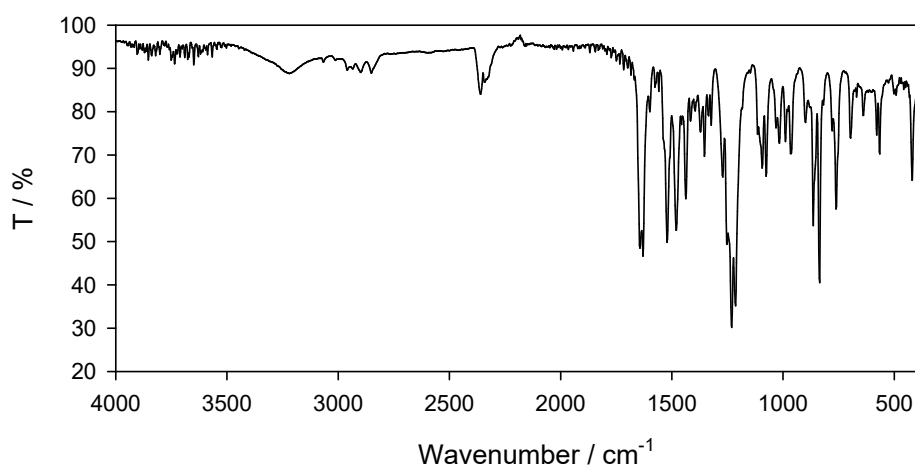

**Fig. S3.** FT-IR (ATR) spectrum of  $\text{H}_3\text{L}^1$ .

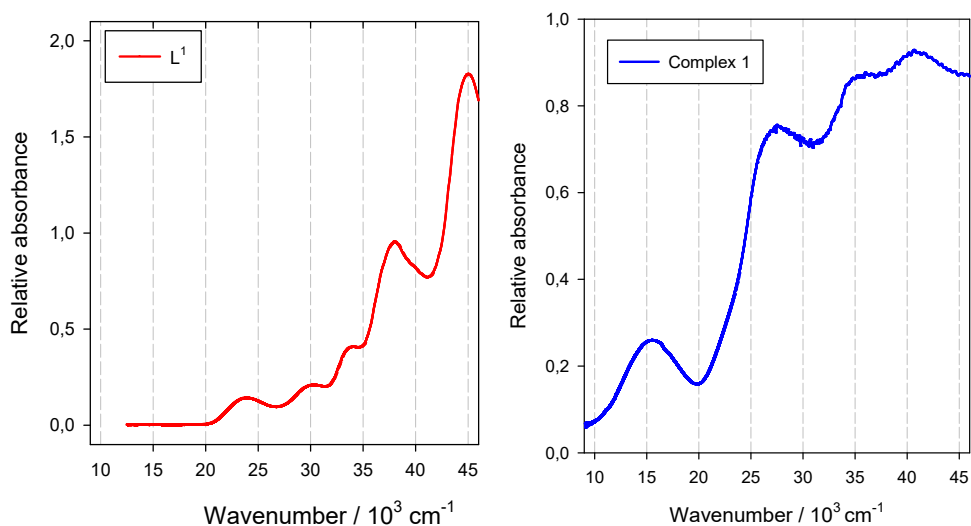

**Fig. S4.** Electronic spectra of  $\text{H}_3\text{L}^1$  (in EtOH,  $c = 1.94 \times 10^{-5} \text{ g} \cdot \text{mol}^{-1}$ ) and **1** (Nujol suspension).

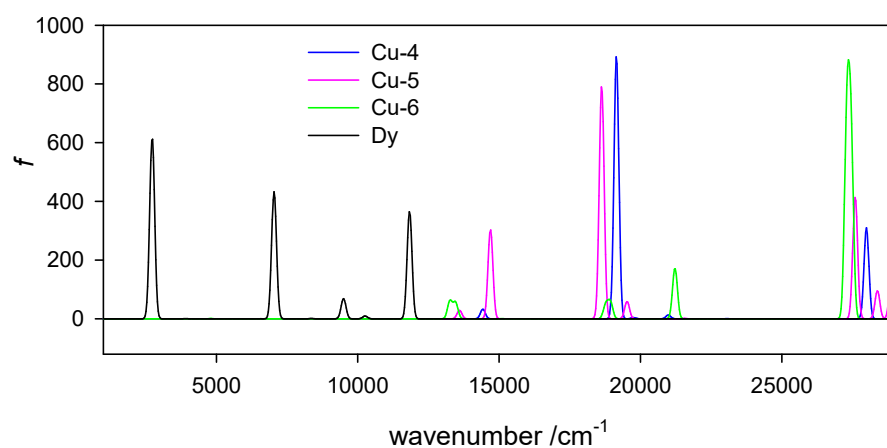

**Fig. S5.** Calculated (TD-DFT) electronic spectra for individual metal centres (four-, five- and six-coordinated Cu(II) and Dy(III)) in the complex **1**.

## Heptanuclear {Dy<sub>2</sub>Cu<sub>5</sub>} complex as a single-molecule magnet

Romana Mičová, Cyril Rajnák, Ján Titiš, Ján Moncol', Jana Nováčiková, Alina Bieňko and Roman Boča

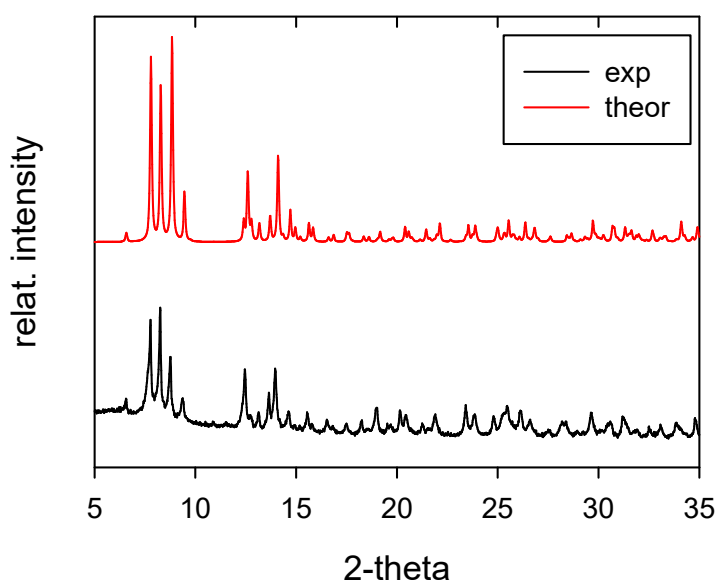

**Fig. S6** Calculated powder diffraction pattern for **1** from cif-file (theor), and recorded pattern at Cu  $\lambda = 1.54060 \text{ \AA}$  (exp).

**Table S1.** Crystal data and structure refinement for **1**.

| <b>Complex 1</b>                                      |                                                                                                                                |
|-------------------------------------------------------|--------------------------------------------------------------------------------------------------------------------------------|
| Empirical formula                                     | C <sub>38</sub> H <sub>46</sub> Br <sub>4</sub> Cl <sub>2</sub> Cu <sub>5</sub> Dy <sub>2</sub> N <sub>4</sub> O <sub>20</sub> |
| Formula weight /g mol <sup>-1</sup>                   | 1912.03                                                                                                                        |
| Crystal system                                        | triclinic                                                                                                                      |
| Space group                                           | <i>P</i> -1                                                                                                                    |
| Temperature /K                                        | 150                                                                                                                            |
| Crystal size /mm                                      | 0.18 × 0.15 × 0.12                                                                                                             |
| <i>Z</i>                                              | 1                                                                                                                              |
| <i>a</i> / Å                                          | 10.7667(2)                                                                                                                     |
| <i>b</i> / Å                                          | 12.5061(3)                                                                                                                     |
| <i>c</i> / Å                                          | 15.2672(3)                                                                                                                     |
| $\alpha$ /°                                           | 66.153(2)                                                                                                                      |
| $\beta$ /°                                            | 69.597(2)                                                                                                                      |
| $\gamma$ /°                                           | 74.811(2)                                                                                                                      |
| <i>V</i> / Å <sup>3</sup>                             | 1744.60(7)                                                                                                                     |
| $\rho_{\text{calc}}$ /g cm <sup>-3</sup>              | 1.820                                                                                                                          |
| $\mu$ /mm <sup>-1</sup>                               | 16.775                                                                                                                         |
| <i>F</i> (000)                                        | 913.0                                                                                                                          |
| Radiation                                             | CuK $\alpha$ ( $\lambda = 1.54186$ )                                                                                           |
| 2 $\theta$ range for data collection/°                | 6.584 to 144.7                                                                                                                 |
| Index ranges                                          | -13 ≤ <i>h</i> ≤ 12, -12 ≤ <i>k</i> ≤ 15, -18 ≤ <i>l</i> ≤ 16                                                                  |
| Data/restraints/parameters                            | 6663/0/345                                                                                                                     |
| Goodness-of-fit on <i>F</i> <sup>2</sup>              | 1.111                                                                                                                          |
| Final R indexes [ <i>I</i> ≥ 2 $\sigma$ ( <i>I</i> )] | R <sub>1</sub> = 0.0496, wR <sub>2</sub> = 0.1371                                                                              |
| R indexes (all data)                                  | R <sub>1</sub> = 0.0594, wR <sub>2</sub> = 0.1430                                                                              |
| Colour                                                | Dark green                                                                                                                     |
| CCDC code                                             | 2160393                                                                                                                        |

## Heptanuclear {Dy<sub>2</sub>Cu<sub>5</sub>} complex as a single-molecule magnet

Romana Mičová, Cyril Rajnák, Ján Titiš, Ján Moncol', Jana Nováčiková, Alina Bieňko and Roman Boča

**Table S2.** Selected bond lengths (Å) in **1**.

|                      |            |                      |            |
|----------------------|------------|----------------------|------------|
| Dy1-Cu1              | 3.4989(4)  | Cu1-O6               | 1.969(4)   |
| Dy1-Cu2              | 3.4113(10) | Cu1-O6 <sup>1</sup>  | 1.969(4)   |
| Dy1-Cu3 <sup>1</sup> | 3.4844(10) | Cu1-O7               | 1.950(5)   |
| Dy1-O1               | 2.601(5)   | Cu1-O7 <sup>1</sup>  | 1.950(5)   |
| Dy1-O2               | 2.336(4)   | Cu1-C11 <sup>1</sup> | 2.7889(17) |
| Dy1-O4 <sup>1</sup>  | 2.357(5)   | Cu1-C11              | 2.7889(17) |
| Dy1-O5 <sup>1</sup>  | 2.544(5)   | Cu2-O2               | 1.959(5)   |
| Dy1-O6               | 2.397(5)   | Cu2-O3               | 1.960(5)   |
| Dy1-O7 <sup>1</sup>  | 2.462(5)   | Cu2-O6               | 1.950(4)   |
| Dy1-O8               | 2.376(4)   | Cu2-N1               | 1.917(6)   |
| Dy1-O9               | 2.380(6)   | Cu2-C11 <sup>1</sup> | 2.6738(19) |
| Dy1-O10              | 2.400(5)   | Cu3-O3               | 1.950(5)   |
|                      |            | Cu3-O4               | 1.954(5)   |
|                      |            | Cu3-O7               | 1.970(4)   |
|                      |            | Cu3-N2               | 1.918(6)   |

Atom numbering:

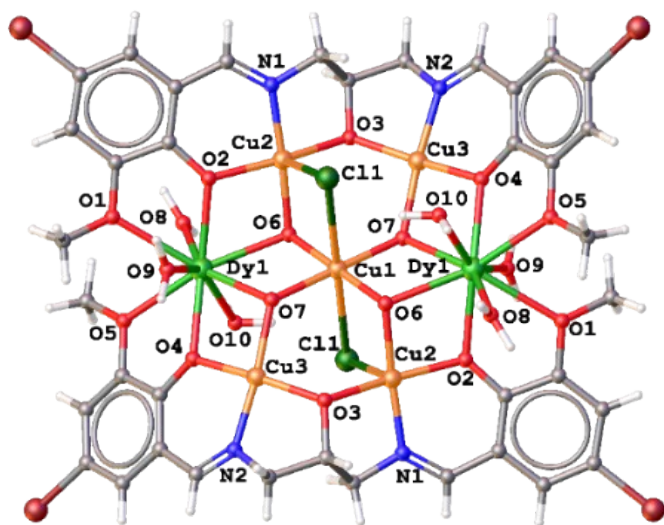

### Heptanuclear {Dy<sub>2</sub>Cu<sub>5</sub>} complex as a single-molecule magnet

Romana Mičová, Cyril Rajnák, Ján Titiš, Ján Moncol', Jana Nováčiková, Alina Bieňko and Roman Boča

**Table S3.** Selected bond angles (°) in chromophores of **1**.

|                                       |            |                                       |            |                                        |            |
|---------------------------------------|------------|---------------------------------------|------------|----------------------------------------|------------|
| Cu2-Dy1-Cu1                           | 54.448(18) | O2-Dy1-O4 <sup>1</sup>                | 150.70(18) | O4 <sup>1</sup> -Dy1-O1                | 111.29(17) |
| Cu2-Dy1-Cu3 <sup>1</sup>              | 112.34(3)  | O2-Dy1-O5 <sup>1</sup>                | 130.11(16) | O4 <sup>1</sup> -Dy1-O5 <sup>1</sup>   | 63.82(15)  |
| Cu3 <sup>1</sup> -Dy1-Cu1             | 59.884(18) | O2-Dy1-O6                             | 67.59(16)  | O4 <sup>1</sup> -Dy1-O6                | 118.62(16) |
| O1-Dy1-Cu1                            | 142.94(11) | O2-Dy1-O7 <sup>1</sup>                | 96.33(15)  | O4 <sup>1</sup> -Dy1-O7 <sup>1</sup>   | 65.44(15)  |
| O1-Dy1-Cu2                            | 96.04(11)  | O2-Dy1-O8                             | 74.53(16)  | O4 <sup>1</sup> -Dy1-O8                | 133.48(17) |
| O1-Dy1-Cu3 <sup>1</sup>               | 131.21(12) | O2-Dy1-O9 <sup>1</sup>                | 80.1(2)    | O4 <sup>1</sup> -Dy1-O9                | 72.4(2)    |
| O2-Dy1-Cu1                            | 82.52(12)  | O2-Dy1-O10                            | 132.95(18) | O4 <sup>1</sup> -Dy1-O10               | 73.19(19)  |
| O2-Dy1-Cu2                            | 33.72(12)  | O4 <sup>1</sup> -Dy1-Cu1              | 91.03(12)  | O5 <sup>1</sup> -Dy1-Cu1               | 146.70(12) |
| O2-Dy1-Cu3 <sup>1</sup>               | 127.79(11) | O4 <sup>1</sup> -Dy1-Cu2              | 144.63(11) | O5 <sup>1</sup> -Dy1-Cu2               | 150.41(11) |
| O2-Dy1-O1                             | 63.39(16)  | O4 <sup>1</sup> -Dy1-Cu3 <sup>1</sup> | 32.32(11)  | O5 <sup>1</sup> -Dy1-Cu3 <sup>1</sup>  | 95.88(11)  |
| O5 <sup>1</sup> -Dy1-O1               | 69.91(16)  | O10-Dy1-Cu1                           | 80.66(13)  | Cl1-Cu1-Dy1                            | 87.02(4)   |
| O6-Dy1-Cu1                            | 32.73(10)  | O10-Dy1-Cu2                           | 104.54(13) | Cl1 <sup>1</sup> -Cu1-Dy1 <sup>1</sup> | 87.02(4)   |
| O6-Dy1-Cu2                            | 33.87(11)  | O10-Dy1-Cu3 <sup>1</sup>              | 78.31(12)  | Cl1-Cu1-Dy1 <sup>1</sup>               | 92.98(4)   |
| O6-Dy1-Cu3 <sup>1</sup>               | 90.69(10)  | O10-Dy1-O1                            | 133.05(17) | Cl1 <sup>1</sup> -Cu1-Cl1 <sup>1</sup> | 180.0      |
| O6-Dy1-O1                             | 128.79(15) | O10-Dy1-O5 <sup>1</sup>               | 71.64(18)  | O2-Cu2-Dy1                             | 41.45(13)  |
| O6-Dy1-O5 <sup>1</sup>                | 143.60(17) | O10-Dy1-O7 <sup>1</sup>               | 92.55(17)  | O2-Cu2-O3                              | 167.85(19) |
| O6-Dy1-O7 <sup>1</sup>                | 65.31(16)  | Dy1 <sup>1</sup> -Cu1-Dy1             | 180.0      | O2-Cu2-Cl1 <sup>1</sup>                | 98.17(15)  |
| O6-Dy1-O10                            | 74.78(17)  | O6 <sup>1</sup> -Cu1-Dy1              | 138.85(14) | O3-Cu2-Dy1                             | 136.87(14) |
| O7 <sup>1</sup> -Dy1-Cu1              | 32.69(11)  | O6-Cu1-Dy1 <sup>1</sup>               | 138.85(14) | O3-Cu2-Cl1 <sup>1</sup>                | 93.98(14)  |
| O7 <sup>1</sup> -Dy1-Cu2              | 79.60(11)  | O6-Cu1-Dy1                            | 41.15(14)  | O6-Cu2-Dy1                             | 43.22(14)  |
| O7 <sup>1</sup> -Dy1-Cu3 <sup>1</sup> | 33.42(10)  | O6 <sup>1</sup> -Cu1-Dy1 <sup>1</sup> | 41.15(4)   | O6-Cu2-O2                              | 84.67(19)  |
| O7 <sup>1</sup> -Dy1-O1               | 132.94(17) | O6 <sup>1</sup> -Cu1-O6               | 180.0      | O6-Cu2-O3                              | 95.1(2)    |
| O7 <sup>1</sup> -Dy1-O5 <sup>1</sup>  | 129.23(15) | O6 <sup>1</sup> -Cu1-Cl1              | 87.93(13)  | O6-Cu2-Cl1 <sup>1</sup>                | 91.67(14)  |
| O8-Dy1-Cu1                            | 112.98(12) | O6 <sup>1</sup> -Cu1-Cl1 <sup>1</sup> | 92.07(13)  | N1-Cu2-Dy1                             | 134.4(2)   |
| O8-Dy1-Cu2                            | 74.80(12)  | O6-Cu1-Cl1 <sup>1</sup>               | 87.93(13)  | N1-Cu2-O2                              | 93.3(2)    |
| O8-Dy1-Cu3 <sup>1</sup>               | 150.70(12) | O6-Cu1-Cl1                            | 92.07(13)  | N1-Cu2-O3                              | 85.7(2)    |
| O8-Dy1-O1                             | 73.11(17)  | O7-Cu1-Dy1 <sup>1</sup>               | 42.99(13)  | N1-Cu2-O6                              | 173.9(2)   |
| O8-Dy1-O5 <sup>1</sup>                | 76.18(16)  | O7 <sup>1</sup> -Cu1-Dy1              | 42.99(13)  | N1-Cu2-Cl1 <sup>1</sup>                | 94.34(18)  |
| O8-Dy1-O6                             | 80.70(16)  | O7 <sup>1</sup> -Cu1-Dy1 <sup>1</sup> | 137.01(13) | Cl1 <sup>1</sup> -Cu2-Dy1              | 97.08(5)   |
| O8-Dy1-O7 <sup>1</sup>                | 145.56(17) | O7-Cu1-Dy1                            | 137.01(13) | O3-Cu3-Dy1 <sup>1</sup>                | 140.14(14) |
| O8-Dy1-O9                             | 137.0(2)   | O7-Cu1-O6                             | 96.01(19)  | O3-Cu3-O4                              | 169.6(2)   |
| O8-Dy1-O10                            | 72.40(17)  | O7 <sup>1</sup> -Cu1-O6               | 83.99(19)  | O3-Cu3-O7                              | 99.32(19)  |
| O9-Dy1-Cu1                            | 97.19(18)  | O7-Cu1-O6 <sup>1</sup>                | 83.99(19)  | O4-Cu3- Dy1 <sup>1</sup>               | 40.16(13)  |
| O9-Dy1-Cu2                            | 101.8(2)   | O7 <sup>1</sup> -Cu1-O6 <sup>1</sup>  | 96.01(19)  | O4-Cu3-O7                              | 83.25(19)  |
| O9-Dy1-Cu3 <sup>1</sup>               | 71.15(16)  | O7 <sup>1</sup> -Cu1-O7               | 180.0      | O7-Cu3- Dy1 <sup>1</sup>               | 43.50(13)  |
| O9-Dy1-O1                             | 64.5(2)    | O7 <sup>1</sup> -Cu1-Cl1 <sup>1</sup> | 92.43(14)  | N2-Cu3- Dy1 <sup>1</sup>               | 132.61(17) |
| O9-Dy1-O5 <sup>1</sup>                | 95.4(2)    | O7-Cu1-Cl1                            | 92.43(14)  | N2-Cu3-O3                              | 85.5(2)    |
| O9-Dy1-O6                             | 120.5(2)   | O7-Cu1-Cl1 <sup>1</sup>               | 87.57(14)  | N2-Cu3-O4                              | 92.5(2)    |
| O9-Dy1-O7 <sup>1</sup>                | 70.6(2)    | O7 <sup>1</sup> -Cu1-Cl1              | 87.57(14)  | N2-Cu3-O7                              | 174.3(2)   |
| O9-Dy1-O10                            | 145.4(2)   | Cl1 <sup>1</sup> -Cu1-Dy1             | 92.98(4)   |                                        |            |

## Heptanuclear $\{\text{Dy}_2\text{Cu}_5\}$ complex as a single-molecule magnet

Romana Mičová, Cyril Rajnák, Ján Titiš, Ján Moncol, Jana Nováčiková, Alina Bieňko and Roman Boča

**Table S4.** Comparison of  $\text{Dy}_2\text{Cu}_5$  complexes.

| 1, Dy: 9-coordination, Cu: 4-, 5-, 6-coordination                                                                                                                                                                                                                                                                                                                                                                                                                                                                              | 2, Dy: 9-coordination, Cu: 4-, 5-, 6-coordination                                                                                                                                                                                                                                                                                                                                    |
|--------------------------------------------------------------------------------------------------------------------------------------------------------------------------------------------------------------------------------------------------------------------------------------------------------------------------------------------------------------------------------------------------------------------------------------------------------------------------------------------------------------------------------|--------------------------------------------------------------------------------------------------------------------------------------------------------------------------------------------------------------------------------------------------------------------------------------------------------------------------------------------------------------------------------------|
|                                                                                                                                                                                                                                                                                                                                                                                                                                                                                                                                |                                                                                                                                                                                                                                                                                                                                                                                      |
| <p>CCDC: 2160393<br/>           DC: <math>M_{\text{mol}}/N_A = 14.2 \mu_B</math> at <math>T = 2.0</math> &amp; <math>B = 7</math> T, no saturation; <math>\chi T/C_0 = 69.4</math> at <math>T = 300</math> K; <math>\chi</math> &amp; <math>M</math>-fitted<br/>           AC: Two (three) relaxation modes,<br/>           HF: <math>U_{\text{eff}}/k_B = 25</math> K, <math>\tau_0 = 1.1 \times 10^{-7}</math> s, <math>B_{\text{DC}} = 0.2</math> T.<br/>           This work (1), <math>L^1 = L^{\text{Br}}</math></p>     | <p>CCDC: 2194405<br/>           Unpublished complex from C. Rajnák's group, <math>L^2 = L^{\text{Cl}}</math></p>                                                                                                                                                                                                                                                                     |
| Dy: 8-coordination, Cu: 5-, 6-coordination                                                                                                                                                                                                                                                                                                                                                                                                                                                                                     | Dy: 8-coordination, Cu: 4-, 5-coordination                                                                                                                                                                                                                                                                                                                                           |
|                                                                                                                                                                                                                                                                                                                                                                                                                                                                                                                                |                                                                                                                                                                                                                                                                                                                                                                                      |
| <p>CCDC: CONZIQ<br/>           DC: <math>\chi</math> – not fitted; <math>M</math> – plotted, not digitized.<br/>           AC: single mode relaxation (HF), on-set of LF – ignored,<br/> <math>U_{\text{eff}}/k_B = 4</math> K, <math>\tau_0 = 3 \times 10^{-6}</math> s; <math>B_{\text{DC}} = 0.09</math> T<br/>           V. Chandrasekhar, A. Dey, S. Das, M. Rouxieres, R. Clerac, <i>Inorg.Chem.</i> (2013), <b>52</b>, 2588.<br/> <a href="https://doi.org/10.1021/ic302614k">https://doi.org/10.1021/ic302614k</a></p> | <p>CCDC: GASJUI<br/>           DC: <math>\chi</math> – not fitted; <math>M</math> – plotted, not digitized.<br/>           AC: silent <math>\chi''</math><br/>           Lin Jiang, Bin Liu, Hao-Wen Zhao, Jin-Lei Tian, Xin Liu, Shi-Ping Yan, <i>CrystEngComm</i> (2017), <b>19</b>, 1816. <a href="https://doi.org/10.1039/C6CE02519F">https://doi.org/10.1039/C6CE02519F</a></p> |



## Heptanuclear {Dy<sub>2</sub>Cu<sub>5</sub>} complex as a single-molecule magnet

Romana Mičová, Cyril Rajnák, Ján Titiš, Ján Moncol', Jana Nováčiková, Alina Bieňko and Roman Boča

| Dy: 8-coordination, Cu: 5-, 6-coordination                                                                                                                                                                                                                                                                                                                                                                                                                                                                                                                                                                                                                                                                                                             | Dy: 9-coordination, Cu: 5-, 6-coordination                                                                                                                                                                                                                                                                                                                                                                                                                                                                                                                                                                                                    |
|--------------------------------------------------------------------------------------------------------------------------------------------------------------------------------------------------------------------------------------------------------------------------------------------------------------------------------------------------------------------------------------------------------------------------------------------------------------------------------------------------------------------------------------------------------------------------------------------------------------------------------------------------------------------------------------------------------------------------------------------------------|-----------------------------------------------------------------------------------------------------------------------------------------------------------------------------------------------------------------------------------------------------------------------------------------------------------------------------------------------------------------------------------------------------------------------------------------------------------------------------------------------------------------------------------------------------------------------------------------------------------------------------------------------|
| <div style="text-align: center;"> 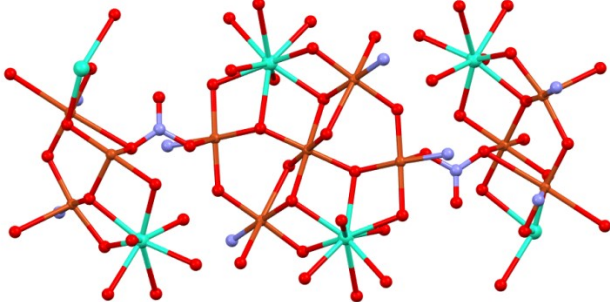 </div> <p>CCDC: KELFIT. catena network via NO<sub>3</sub>,<br/>           DC: <math>\chi</math> – not fitted; <math>M</math> – plotted, not digitized.<br/>           AC: <math>U_{\text{eff}}/k_B = 8</math> K, <math>\tau_0 = 3.1 \times 10^{-6}</math> s; <math>B_{\text{DC}} = 0</math></p> <p>A. Dey, S. Das, S. Kundu, A. Mondal, M. Rouzieres, C. Mathoniere, R. Clerac, R.S. Narayanan, V. Chandrasekhar, <i>Inorg.Chem.</i> (2017), <b>56</b>, 14612.<br/> <a href="https://doi.org/10.1021/acs.inorgchem.7b02450">https://doi.org/10.1021/acs.inorgchem.7b02450</a></p>                                                  | <div style="text-align: center;">  </div> <p>CCDC: NEYCUS, catena network via NO<sub>3</sub>,<br/>           DC: <math>\chi</math> – not fitted; <math>M</math> – plotted, not digitized.<br/>           AC (estimate, no fitting): <math>U_{\text{eff}}/k_B = 12</math> K, <math>\tau_0 = 10^{-6}</math> s; <math>B_{\text{DC}} = 0</math></p> <p>A. Dey, S. Das, M.A. Palacios, E. Colacio, V. Chandrasekhar, <i>Eur.J.Inorg.Chem.</i> (2018), 1645.<br/> <a href="https://doi.org/10.1002/ejic.201701429">https://doi.org/10.1002/ejic.201701429</a></p> |
| <div style="text-align: center;">  </div> <p>CCDC: SODQEK<br/>           DC: <math>M_{\text{mol}}/N_A = 21.3 \mu_B</math> at <math>T = 2.0</math> &amp; <math>B = 5</math> T, no saturation, <math>\chi</math> – not fitted;<br/>           AC: single mode relaxation,<br/> <math>U_{\text{eff}}/k_B = 13</math> K, <math>\tau_0 = 1.2 \times 10^{-6}</math> s; <math>B_{\text{DC}} = 0</math>;<br/>           D. Dermizaki, V. Psycharis, Y. Sanakis, Th. C. Stamatatos, M. Pissas, C. P. Raptopoulou, <i>Polyhedron</i>, 2019, <b>169</b>, 135-143.<br/> <a href="https://doi.org/10.1016/j.poly.2019.05.004">https://doi.org/10.1016/j.poly.2019.05.004</a></p> |                                                                                                                                                                                                                                                                                                                                                                                                                                                                                                                                                                                                                                               |

**Table S5.** Coordination polyhedra in **1**.

| Atom             | $N_k$ | Chromophore                         | Shape index | Geometry       | Abbr. |
|------------------|-------|-------------------------------------|-------------|----------------|-------|
| Cu1              | 6     | {CuO <sub>4</sub> Cl <sub>2</sub> } | 3.179       | Octahedron     | Oh    |
| Cu2              | 5     | {CuO <sub>3</sub> NCl}              | 1.146       | Square pyramid | Spy   |
| Cu2 <sup>1</sup> | 5     | {CuO <sub>3</sub> NCl}              | 1.146       | Square pyramid | Spy   |
| Cu3              | 4     | {CuO <sub>3</sub> N}                | 0.699       | Square         | Sq    |
| Cu3 <sup>1</sup> | 4     | {CuO <sub>3</sub> N}                | 0.699       | Square         | Sq    |
| Dy1              | 9     | {DyO <sub>9</sub> }                 | 7.048       | Capped cube    | Ccu   |
| Dy1 <sup>1</sup> | 9     | {DyO <sub>9</sub> }                 | 7.053       | Capped cube    | Ccu   |

**Heptanuclear {Dy<sub>2</sub>Cu<sub>5</sub>} complex as a single-molecule magnet**

Romana Mičová, Cyril Rajnák, Ján Titiš, Ján Moncol, Jana Nováčiková, Alina Bieňko and Roman Boča

---

## Heptanuclear $\{\text{Dy}_2\text{Cu}_5\}$ complex as a single-molecule magnet

Romana Mičová, Cyril Rajnák, Ján Titiš, Ján Moncol', Jana Nováčiková, Alina Bieňko and Roman Boča

### DFT calculations

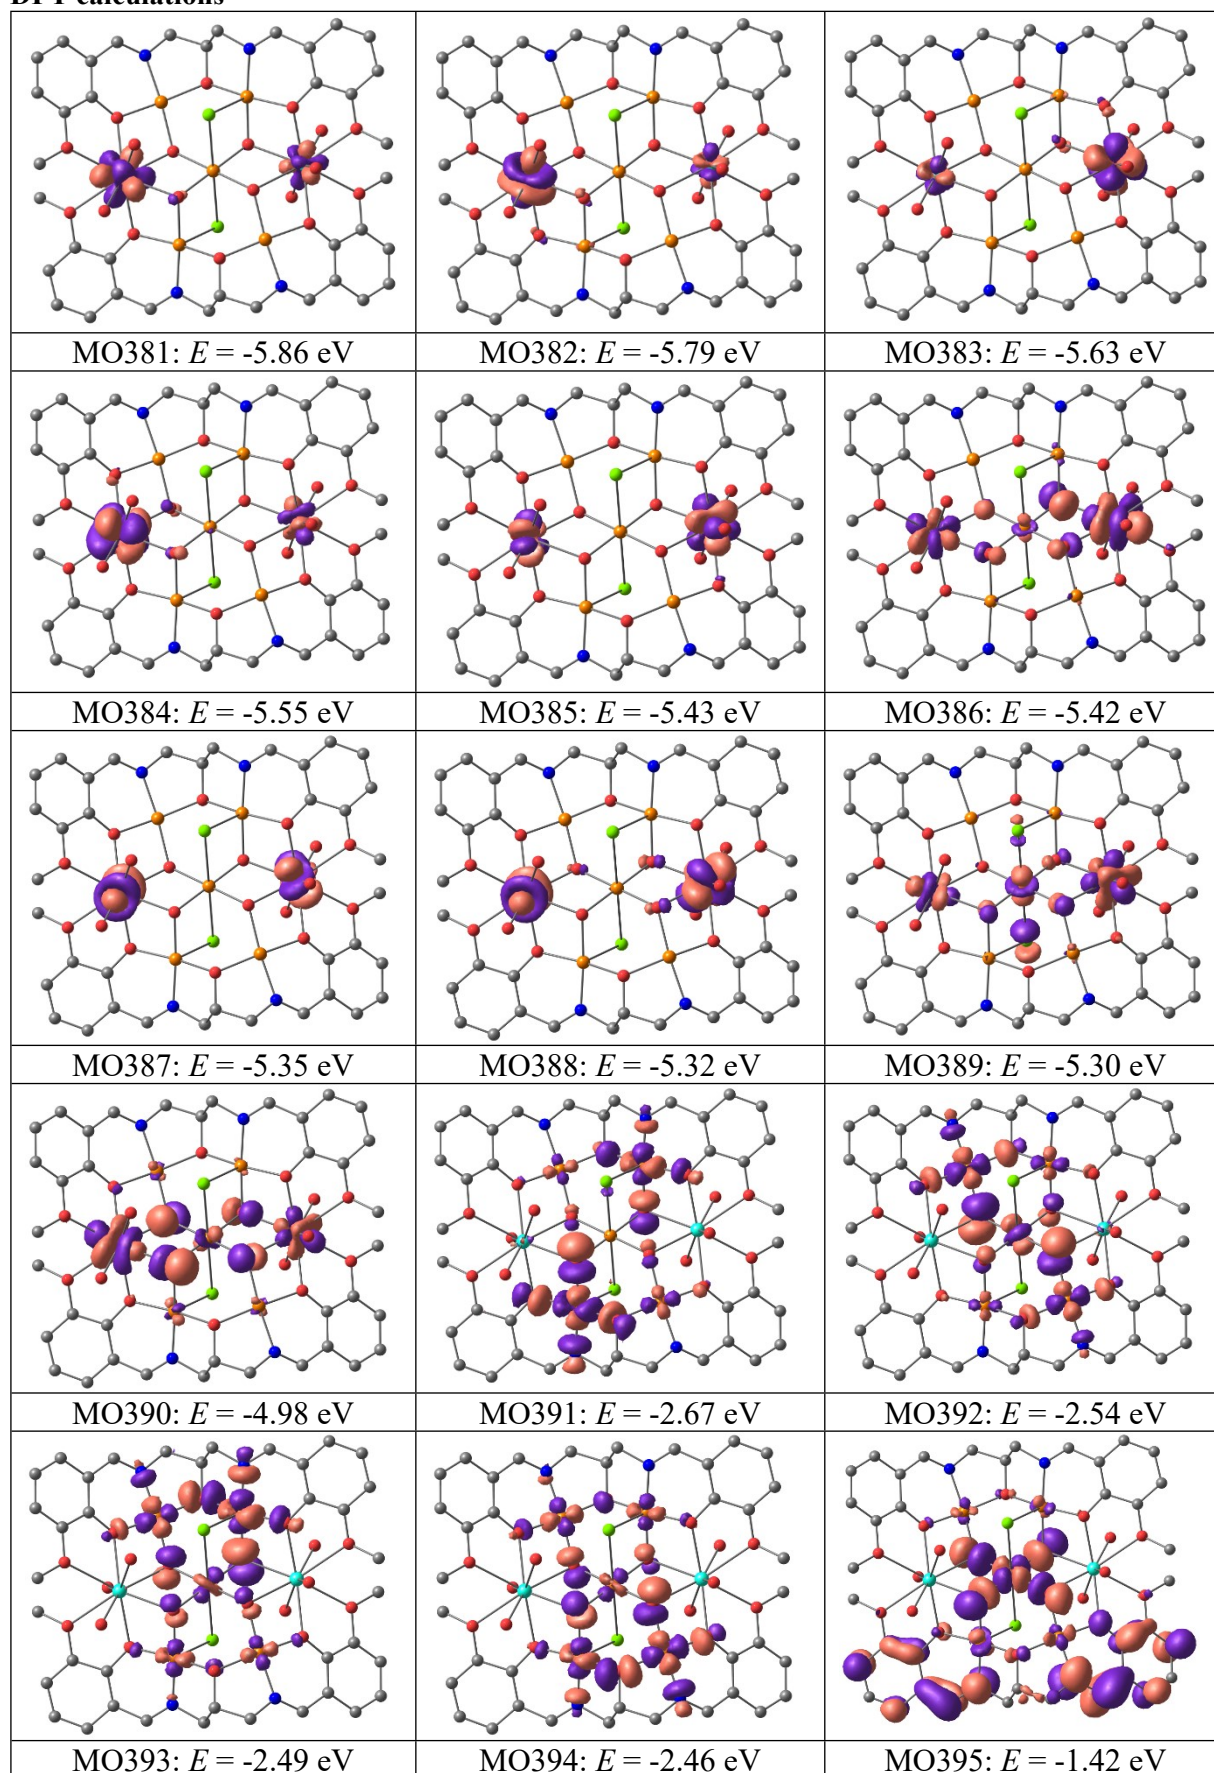

Fig. S7. Single-occupied quasi-restricted orbitals (DFT) for 1.

## Heptanuclear $\{\text{Dy}_2\text{Cu}_5\}$ complex as a single-molecule magnet

Romana Mičová, Cyril Rajnák, Ján Titiš, Ján Moncol', Jana Nováčiková, Alina Bieňko and Roman Boča

### DC magnetic data

#### Factoring of large-dimensional matrices according to the spin $S$ and/or total angular momentum $J$

The principal problem associated with a computational approach for large exchange coupled systems lies in the size of the interaction matrices. The Heisenberg Hamiltonian appropriate to the exchange coupled system reads

$$\hat{H}^{\text{ex}} = - \sum_{A < B}^N J_{AB} (\mathbf{S}_A \cdot \mathbf{S}_B)$$

and it generates an interaction matrix  $H_{LK} = \langle L | \hat{H}^{\text{ex}} | K \rangle$  in the basis set of spin kets. The size of such a matrix grows rapidly with the number of constituent spins, i.e.

$$M = \prod_{A=1}^N (2S_A + 1)$$

In the  $\{\text{Dy}_2\text{Cu}_5\}$  system with  $J(\text{Dy}) = 15/2$  and  $S(\text{Cu}) = 1/2$  the total number of basis set functions is  $N = 16^2 \cdot 2^5 = 8192$ . Such a big interaction matrix can be factored, using the apparatus of the irreducible tensor operators, according to the molecular  $J = 1/2$  through  $35/2$  to smaller matrices of the dimension 20, 30, 32, 32, 32, 32, 32, 32, 32, 32, 32, 31, 26, 16, 6 and 1. In this model the molecular  $J$  is a “good quantum number” and the Zeeman term need be applied assuming uniform g-factors,  $g_{\text{eff}}$ .

The Heisenberg exchange Hamiltonian commutes with the total spin of the system

$$[\hat{H}^{\text{ex}}, \hat{S}^2] = 0, \quad [\hat{H}^{\text{ex}}, \hat{S}_z] = 0$$

Therefore a set of eigenstates common for  $\{\hat{H}^{\text{ex}}, \hat{S}^2, \hat{S}_z\}$  operators exists; this means that the states spanning different total spin (or  $J$ ) are orthogonal

$$H_{LK} = \langle L : \dots S' M' | \hat{H}^{\text{ex}} | K : \dots S M \rangle = \delta_{S'S} \delta_{M'M} (2S + 1)^{-1/2} \langle L : \dots S | \hat{H}^{\text{ex}} | K : \dots S \rangle$$

It allows a factoring of the interaction matrix into blocks of a much lower size

$$\mathbf{H}^{\text{ex}} \rightarrow \begin{pmatrix} \boxed{S = S_{\min}} & 0 & \dots & 0 & 0 \\ 0 & \boxed{S = S_{\min} + 1} & \dots & 0 & 0 \\ \dots & \dots & \dots & \dots & \dots \\ 0 & 0 & \dots & \boxed{S = S_{\max} - 1} & 0 \\ 0 & 0 & \dots & 0 & \boxed{S = S_{\max}} \end{pmatrix}$$

which can be treated (diagonalized) independently.

The matrix elements of the interaction operators in the coupled basis set of spin kets  $|K\rangle = |(S_1, S_2, \dots, S_N), (S_{12}, S_{1...3}, \dots, S_{1...N}), S\rangle$  have been generated with the help of the irreducible tensor operators for a loop for  $S = S_{\min}$  until  $S = S_{\max}$ . The intermediate spins (IS) are abbreviated as  $S_{1...N} = \mathcal{S}_N^{\circ}$  and the full set of IS is  $(\mathcal{S}_N^{\circ})$ . The general form of such matrix elements utilizes a consecutive decoupling of spins until the elementary spin operators with the help of the  $9j$ -symbols (recoupling coefficients of the angular momenta) according to the formula

$$\begin{aligned} & \langle S_1 S_2 \dots S_N (\mathcal{S}_N^{\circ}) S' | \hat{H}^{\text{ex}} | S_1 S_2 \dots S_N (\mathcal{S}_N^{\circ}) S \rangle \\ &= \sum_{k_1 k_2 \dots k_N} \langle S_N | \hat{T}_{k_N}^{\mathbf{r}} | S_N \rangle \times \sum_{k_2^{\circ} k_3^{\circ} \dots k_{N-1}^{\circ}} G[k_1 k_2 (k_2^{\circ}) k_3 (k_3^{\circ}) \dots k_{N-1} (k_{N-1}^{\circ}) k_N] \\ & \times \prod_{i=1}^{N-1} [(2\mathcal{S}_{i+1}^{\circ} + 1)(2\mathcal{S}_{i+1}^{\circ} + 1)(2k_{i+1}^{\circ} + 1)]^{1/2} \begin{Bmatrix} \mathcal{S}_i^{\circ} & \mathcal{S}_i^{\circ} & k_i^{\circ} \\ S_{i+1} & S_{i+1} & k_{i+1} \\ \mathcal{S}_{i+1}^{\circ} & \mathcal{S}_{i+1}^{\circ} & k_{i+1}^{\circ} \end{Bmatrix} \langle S_i | \hat{T}_{k_i}^{\mathbf{r}}(S_i) | S_i \rangle \end{aligned}$$

The only non-zero proportionality factor accounting for the relationship between the scalar and tensor product of spin operators is

## Heptanuclear $\{\text{Dy}_2\text{Cu}_5\}$ complex as a single-molecule magnet

Romana Mičová, Cyril Rajnák, Ján Titiš, Ján Moncol', Jana Nováčiková, Alina Bieňko and Roman Boča

$$G[k_1 k_2 (\overset{\circ}{k}_2) k_3 (\overset{\circ}{k}_3) \dots k_{N-1} (\overset{\circ}{k}_{N-1}) k_N] = \sqrt{3} J_{ij}$$

where the tensor ranks are  $k_i = k_j = 1$  for  $i \neq j$ ,  $k_f = 0$  for  $f \neq i, j$ , and  $k = \overset{\circ}{k}_N = 0$ . The matrix elements of the elementary spin operators are trivial

$$\begin{aligned} \left\langle S_f \left\| \hat{T}_{k_f=0}^{\mathbf{r}}(S_f) \right\| S_f \right\rangle &= (2s_f + 1)^{1/2} \\ \left\langle S_f \left\| \hat{T}_{k_f=1}^{\mathbf{r}}(S_f) \right\| S_f \right\rangle &= [s_f(s_f + 1)(2s_f + 1)]^{1/2} \end{aligned}$$

with  $(s_f) = S_1 S_2 \dots S_N$ .

A computational problem arises when the magnetic field is applied: the matrix elements of the Zeeman term in the basis set of the coupled kets are off-diagonal in the total spin number. There is one exception: when all  $g$ -factors are equal, then the off-diagonal matrix elements of the Zeeman operator vanish exactly. This is really a fortunate case, since then the Zeeman contributions can be simply added to the roots of the zero-field Hamiltonian

$$\varepsilon(S, B) = \varepsilon_0(S) + \mu_B g_{\text{iso}} B M_S$$

Then the magnetic functions (magnetization and susceptibility) can be exactly expressed with the help of the thermodynamic partition function

$$\begin{aligned} M_{\text{mol}} &= N_A \frac{1}{Z} T_1 \\ \overset{\circ}{\chi}_{\text{mol}} &= \frac{N_A \mu_0}{k_B T} \frac{1}{Z^2} (T_2 Z - T_1^2) \end{aligned}$$

The terms entering the magnetization and the differential magnetic susceptibility are

$$\begin{aligned} Z &= \sum_i \exp(-\varepsilon_i / k_B T) = \sum_{S=S_{\text{min}}}^{S_{\text{max}}} \sum_{M_S=-S}^{+S} \exp[(n_s J - \mu_B g B M_S) / k_B T] \\ T_1 &= \sum_i \left( -\frac{\partial \varepsilon_i}{\partial B} \right) \exp(-\varepsilon_i / k_B T) = \mu_B g \sum_{S=S_{\text{min}}}^{S_{\text{max}}} \sum_{M_S=-S}^{+S} M_S \exp[(n_s J - \mu_B g B M_S) / k_B T] \\ T_2 &= \sum_i \left( \frac{\partial^2 \varepsilon_i}{\partial B^2} \right) \exp(-\varepsilon_i / k_B T) = (\mu_B g)^2 \sum_{S=S_{\text{min}}}^{S_{\text{max}}} \sum_{M_S=-S}^{+S} M_S^2 \exp[(n_s J - \mu_B g B M_S) / k_B T] \end{aligned}$$

with  $n_s = S(S+1)/2$ .

The critical step of the procedure is the evaluation of the reduced matrix elements of the compound operator

$$R_{I'S'; IS}^{AB(k)} = \left\langle I'S' \left\| \hat{T}_k^{\mathbf{r}}(S_A \otimes S_B) \right\| IS \right\rangle$$

which depends upon all intermediate spins  $(I'S'; IS)$ ; then the decoupling formula over the uncoupled spins adopts a form

$$\begin{aligned} &\left\langle S_1 S_2 \dots S_N; \overset{\circ}{S}_2 \overset{\circ}{S}_3 \dots \overset{\circ}{S}_{N-1} S' \left\| \hat{T}_k^{\mathbf{r}} \right\| S_1 S_2 \dots S_N; \overset{\circ}{S}_2 \overset{\circ}{S}_3 \dots \overset{\circ}{S}_{N-1} S \right\rangle = \left\langle S_1 \left\| \hat{T}_{k_1}^{\mathbf{r}}(S_1) \right\| S_1 \right\rangle \\ &\times [(2\overset{\circ}{S}_2 + 1)(2\overset{\circ}{S}_2 + 1)(2\overset{\circ}{k}_2 + 1)]^{1/2} \begin{Bmatrix} S_1 & S_1 & k_1 \\ S_2 & S_2 & k_2 \\ \overset{\circ}{S}_2 & \overset{\circ}{S}_2 & \overset{\circ}{k}_2 \end{Bmatrix} \left\langle S_2 \left\| \hat{T}_{k_2}^{\mathbf{r}}(S_2) \right\| S_2 \right\rangle \\ &\times [(2\overset{\circ}{S}_3 + 1)(2\overset{\circ}{S}_3 + 1)(2\overset{\circ}{k}_3 + 1)]^{1/2} \begin{Bmatrix} \overset{\circ}{S}_2 & \overset{\circ}{S}_2 & \overset{\circ}{k}_2 \\ S_3 & S_3 & k_3 \\ \overset{\circ}{S}_3 & \overset{\circ}{S}_3 & \overset{\circ}{k}_3 \end{Bmatrix} \left\langle S_3 \left\| \hat{T}_{k_3}^{\mathbf{r}}(S_3) \right\| S_3 \right\rangle \\ &\times [\dots] \times [(2S' + 1)(2S + 1)(2k + 1)]^{1/2} \begin{Bmatrix} \overset{\circ}{S}_{N-1} & \overset{\circ}{S}_{N-1} & \overset{\circ}{k}_{N-1} \\ S_N & S_N & k_N \\ S' & S & k \end{Bmatrix} \left\langle S_N \left\| \hat{T}_{k_N}^{\mathbf{r}}(S_N) \right\| S_N \right\rangle \end{aligned}$$

## Heptanuclear {Dy<sub>2</sub>Cu<sub>5</sub>} complex as a single-molecule magnet

Romana Mičová, Cyril Rajnák, Ján Titiš, Ján Moncol', Jana Nováčiková, Alina Bieňko and Roman Boča

where  $S_i^o = S_{12\dots i}$  denote the intermediate spins and  $k_i^o = k_{12\dots i}$  the intermediate operator ranks.

In the above procedure two kinds of the operators are met

a) bilinear isotropic exchange

$$\hat{H}^{\text{iso}} = \sum_A \sum_{B>A}^N (-J_{AB}) (S_A^{\mathbf{r}} \cdot S_B^{\mathbf{r}}) \hbar^{-2} = \sum_A \sum_{B>A}^N (-J_{AB}) (-\sqrt{3}) \left\{ \hat{T}_{0,0}^{\mathbf{r}} (S_A^{\mathbf{r}} \otimes S_B^{\mathbf{r}}) \right\} \hbar^{-2}$$

b) the Zeeman operator

$$\hat{H}^Z = \mu_B \sum_A^N (B \cdot \bar{g}_A \cdot S_A^{\mathbf{r}}) \hbar^{-1} = \mu_B \sum_A \sum_{q=-1}^{+1} (-1)^q (B \cdot \bar{g}_A)_{1,-q} \left\{ \hat{T}_{1,q}^{\mathbf{r}} (S_A^{\mathbf{r}}) \right\} \hbar^{-1}$$

For details see: R. Boča, A Handbook of Magnetochemical Formulae, Elsevier, Amsterdam, 2012.

**Table S6.** Topological matrix for exchange interactions referring to the core of **1**.

|      | Dy | Cu4 | Cu5 | Cu6 | Cu5' | Cu4' | Dy' |
|------|----|-----|-----|-----|------|------|-----|
| Dy   | -  | J1  | J2  | J3  | -    | -    | -   |
| Cu4  |    | -   | J4  | J5  | -    | -    | -   |
| Cu5  |    |     | -   | J6  | -    | -    | -   |
| Cu6  |    |     |     | -   | J6   | J5   | J3  |
| Cu5' |    |     |     |     | -    | J4   | J2  |
| Cu4' |    |     |     |     |      | -    | J1  |
| Dy'  |    |     |     |     |      |      | -   |

A coupling model has been employed with the topological matrix for pair interactions as shown in Table S9 referring to the core of **1** (Fig. S10). In order to avoid an overparametrization, only two exchange interactions were considered in the fitting procedure, namely  $J_{\text{Dy-Cu}} = J1 = J2 = J3$ , and  $J_{\text{Cu-Cu}} = J4 = J5 = J6$ . The total number of basis set functions is  $N = 16^2 \cdot 2^5 = 8192$ ; such a big interaction matrix can be factored, using the apparatus of the irreducible tensor operators, according to the molecular  $J = 1/2$  through  $35/2$  to smaller matrices of the dimension 20, 30, 32, 32, 32, 32, 32, 32, 32, 32, 32, 31, 26, 16, 6 and 1 (see also SI). In this model the molecular  $J$  is a “good quantum number” and the Zeeman term need be applied assuming uniform g-factors,  $g_{\text{eff}}$ . Otherwise, off-diagonal matrix element will appear and the blocking loses its advantage. The fit can be improved by considering more parameters such as different coupling constants and the temperature-independent magnetism. Involvement of different g-factors and Stevens operators will cause a return to the high-dimensionality problem that is not tractable nowadays.

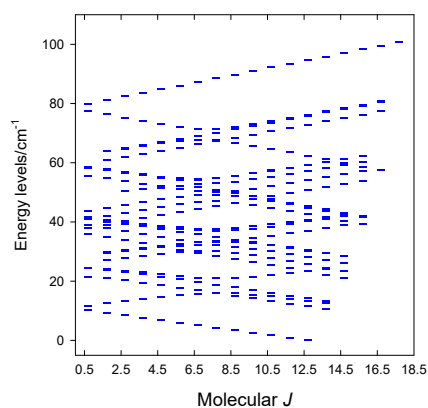

**Fig. S8** Calculated spectrum of zero-field energy levels for **1** (482 entries).

## Heptanuclear $\{\text{Dy}_2\text{Cu}_3\}$ complex as a single-molecule magnet

Romana Mičová, Cyril Rajnák, Ján Titiš, Ján Moncol', Jana Nováčiková, Alina Bieňko and Roman Boča

### AC magnetic data

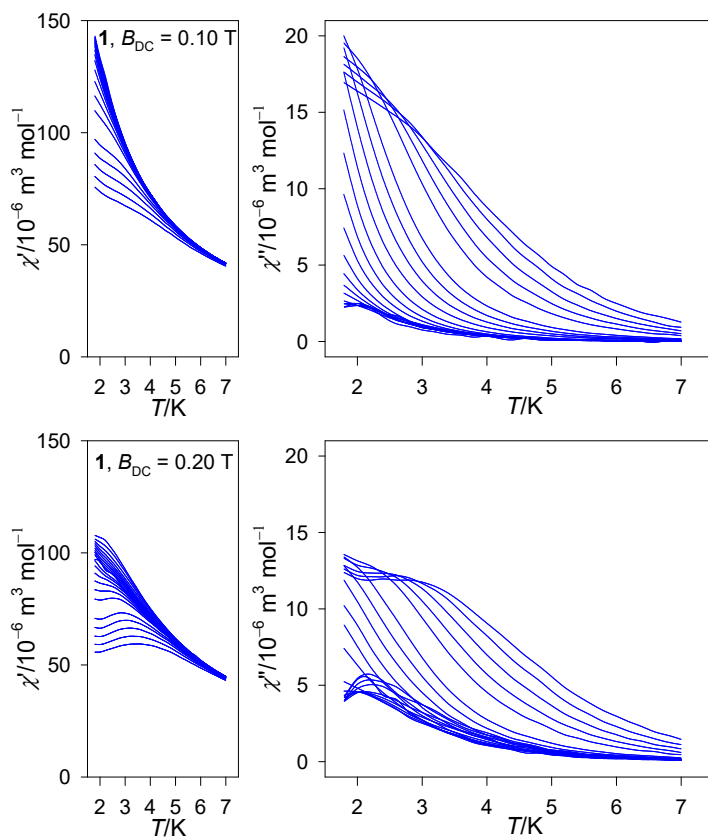

**Fig. S9** Temperature dependence of the AC susceptibility for **1**.

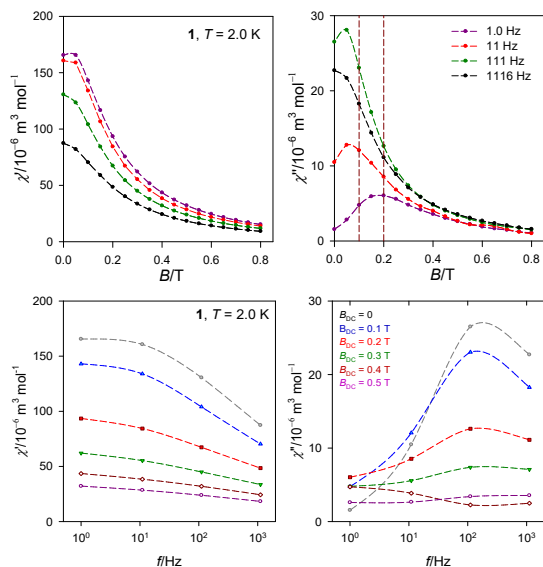

**Fig. S10** Field and frequency dependence of the AC susceptibility at  $T = 2.0$  K. Lines are guide for eyes. Verticals identify the  $B_{\text{DC}}$  used for the detailed frequency dependence.

## Heptanuclear $\{\text{Dy}_2\text{Cu}_3\}$ complex as a single-molecule magnet

Romana Mičová, Cyril Rajnák, Ján Titiš, Ján Moncol', Jana Nováčiková, Alina Bieňko and Roman Boča

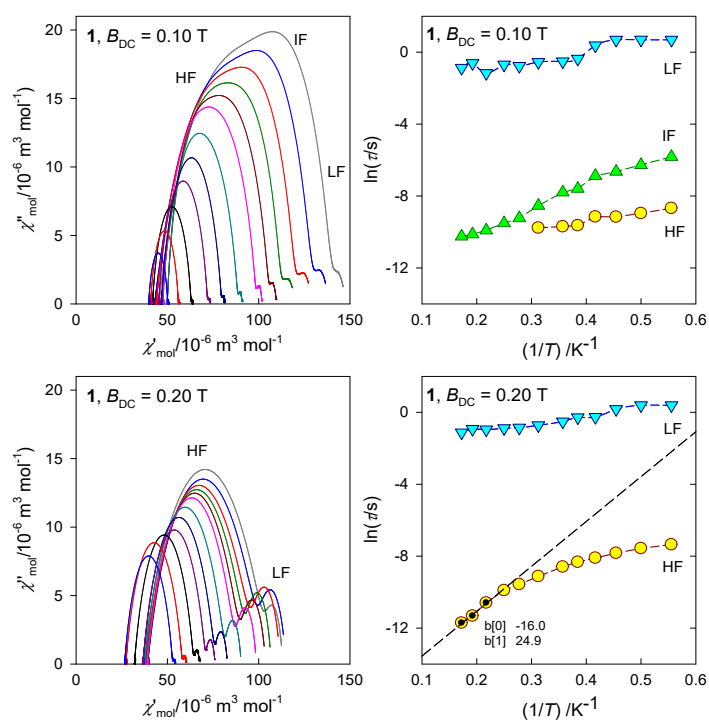

**Fig. S11** Argand diagram (left) and Arrhenius-like plot (right) for **1**:  $U_{\text{eff}}/k_{\text{B}} = 24.9$  K,  $\tau_0 = 1.1 \times 10^{-7}$  s at  $B_{\text{DC}} = 0.2$  T.



## Heptanuclear {Dy<sub>2</sub>Cu<sub>5</sub>} complex as a single-molecule magnet

Romana Mičová, Cyril Rajnák, Ján Titiš, Ján Moncol', Jana Nováčiková, Alina Bieňko and Roman Boča

**Table S7.** Temperature dependence of AC susceptibility parameters for **1** at  $B_{DC} = 0.1$  T. <sup>a</sup>

| <i>T</i> /K | <i>R</i> ( $\chi'$ )<br>/% | <i>R</i> ( $\chi''$ )<br>/% | $\chi_s$ | $\chi_{LF}$ | $\alpha_{LF}$ | $\tau_{LF}$<br>/s | $\chi_{IF}$ | $\alpha_{IF}$ | $\tau_{IF}$<br>/10 <sup>-3</sup> s | $\chi_{HF}$ | $\alpha_{HF}$ | $\tau_{HF}$<br>/10 <sup>-6</sup> s | $\chi_{LF}$ | $\chi_{IF}$ | $\chi_{HF}$ |
|-------------|----------------------------|-----------------------------|----------|-------------|---------------|-------------------|-------------|---------------|------------------------------------|-------------|---------------|------------------------------------|-------------|-------------|-------------|
| 1.8         | 0.64                       | 0.97                        | 45(15)   | 52(31)      | .37(9)        | 2(4)              | 79(70)      | .15           | 3(8)                               | 147(9)      | .46(2)        | 170                                | .07         | .26         | .67         |
| 2.0         | 0.17                       | 0.71                        | 43(3)    | 51(7)       | .40(2)        | 2(1)              | 74(16)      | .14(7)        | 2(1)                               | 138(2)      | .45(6)        | 127(47)                            | .09         | .24         | .67         |
| 2.2         | 0.43                       | 0.65                        | 44(9)    | 53(20)      | .45           | 2(3)              | 74(48)      | .15           | 1(3)                               | 129(7)      | .41(2)        | 104                                | .11         | .25         | .64         |
| 2.4         | 0.28                       | 0.81                        | 46(7)    | 55(13)      | .49(3)        | 1(1)              | 73(40)      | .14           | 1(3)                               | 120(4)      | .36(2)        | 105(96)                            | .11         | .25         | .64         |
| 2.6         | 0.21                       | 0.74                        | 50(8)    | 54(7)       | .25(1)        | .56(1)            | 90(20)      | .26(2)        | .50(1)                             | 109(4)      | .14           | 56(15)                             | .07         | 0.61        | .33         |
| 2.8         | 1.0                        | 0.60                        | 47       | 50          | .18           | .59(4)            | 80          | .27(2)        | .41                                | 101(1)      | .21           | 61                                 | .06         | .54         | .40         |
| 3.2         | 0.18                       | 0.52                        | 50(4)    | 52(4)       | .21(1)        | .57(1)            | 84(26)      | .27(1)        | .19(1)                             | 90(2)       | .0027         | 57(23)                             | .05         | .78         | .17         |
| 3.6         | 1.88                       | 1.32                        | 49       | 50          | .20           | .46               | 83          | .26           | .10                                | 82(2)       | .29           | 30                                 | .04         | .99         | -.03        |
| 3.6b        | 0.26                       | 1.26                        | 47(9)    | -           | -             | -                 | 48(1)       | .19(1)        | .46(1)                             | 81(2)       | .27(1)        | 98(5)                              | -           | .04         | .96         |
| 4.0b        | 0.20                       | 0.68                        | 45(9)    | -           | -             | -                 | 46(1)       | .28(1)        | .49(1)                             | 73(2)       | .24(1)        | 74(4)                              | -           | .04         | .96         |
| 4.6b        | 0.13                       | 1.48                        | 42(8)    | -           | -             | -                 | 42(8)       | .04           | .31(6)                             | 63(6)       | .24(1)        | 49(3)                              | -           | .02         | .98         |
| 5.2b        | 0.38                       | 2.04                        | 40(2)    | -           | -             | -                 | 41(2)       | .23           | .54                                | 56(3)       | .22(4)        | 40(13)                             | -           | .02         | .98         |
| 5.8b        | 0.25                       | 1.29                        | 40(1)    | -           | -             | -                 | 40(2)       | .25           | .41                                | 50(1)       | .21(4)        | 35(12)                             | -           | .02         | .98         |

<sup>a</sup> Obtained by the three-set Debye model.

**Table S8.** Temperature dependence of AC susceptibility parameters for **1** at  $B_{DC} = 0.2$  T. <sup>a</sup>

| <i>T</i> /K | <i>R</i> ( $\chi'$ )<br>/% | <i>R</i> ( $\chi''$ )<br>/% | $\chi_s$ | $\chi_{IF}$ | $\alpha_{IF}$ | $\tau_{IF}$<br>/s | $\chi_{HF}$ | $\alpha_{HF}$ | $\tau_{HF}$<br>/10 <sup>-6</sup> s | $\chi_{LF}$ | $\chi_{HF}$ |
|-------------|----------------------------|-----------------------------|----------|-------------|---------------|-------------------|-------------|---------------|------------------------------------|-------------|-------------|
| 1.8         | 0.81                       | 4.2                         | 36(2)    | 44(5)       | .16           | 1.5(8)            | 113(3)      | .50(2)        | 642(54)                            | .11         | .89         |
| 2.0         | 0.79                       | 4.0                         | 37(2)    | 51(6)       | .25(1)        | 1.5(7)            | 114(3)      | .48(2)        | 516(46)                            | .18         | .82         |
| 2.2         | 0.41                       | 3.2                         | 37(1)    | 52(3)       | .26(6)        | 1.2(2)            | 111(2)      | .47(1)        | 397(23)                            | .20         | .80         |
| 2.4         | 0.32                       | 2.9                         | 38(1)    | 51(2)       | .22(4)        | .77(7)            | 106(7)      | .45(1)        | 304(16)                            | .19         | .81         |
| 2.6         | 0.27                       | 2.1                         | 39(9)    | 52(2)       | .28(3)        | .75(7)            | 103(6)      | .42(1)        | 241(11)                            | .21         | .79         |
| 2.8         | 0.21                       | 1.8                         | 38(8)    | 49(1)       | .23(2)        | .59(3)            | 98(3)       | .41(9)        | 185(8)                             | .18         | .82         |
| 3.2         | 0.21                       | 1.4                         | 37(1)    | 46(1)       | .23(2)        | .48(2)            | 90(2)       | .39(1)        | 109(6)                             | .16         | .84         |
| 3.6         | 0.22                       | 1.3                         | 36(1)    | 43(1)       | .26(3)        | .42(3)            | 82(2)       | .36(1)        | 69(6)                              | .15         | .85         |
| 4.0         | 0.31                       | 2.0                         | 36(2)    | 42(2)       | .25(5)        | .41(5)            | 76(3)       | .34(2)        | 50(8)                              | .13         | .87         |
| 4.6         | 0.28                       | 2.4                         | 35(3)    | 38(3)       | .24(6)        | .39(6)            | 67(2)       | .32(2)        | 30(7)                              | .09         | .91         |
| 4.6b        | 0.31                       | 2.9                         | 32(5)    | 35(5)       | .31(8)        | .38(8)            | 67(3)       | .33(3)        | 25(8)                              | .09         | .91         |
| 5.2         | 0.29                       | 2.0                         | 27(9)    | 29(9)       | .31(1)        | .39(1)            | 60(2)       | .34(4)        | 12(7)                              | .06         | .94         |
| 5.8         | 0.36                       | 4.1                         | 26(20)   | 28(20)      | .37(2)        | .32(2)            | 54(3)       | .31(8)        | 8                                  | .04         | .96         |

<sup>a</sup> Obtained by the two-set Debye model;  $\chi$  in units of 10<sup>-6</sup> m<sup>3</sup> mol<sup>-1</sup>; *R*( $\chi'$ ) and *R*( $\chi''$ ) – discrepancy factors of the fit.

**Table S9.** Broken symmetry magnetic coupling analysis for **1**.

|         | <i>J</i> 1 | <i>J</i> 2 | <i>J</i> 3 |
|---------|------------|------------|------------|
| Cu1-Cu2 | 535.27     | 267.64     | 528.64     |
| Cu1-Cu3 | 482.29     | 241.14     | 475.61     |
| Cu2-Cu3 | -74.80     | -37.40     | -71.64     |
| Dy-Cu1  | 1.59       | 0.87       | 1.66       |

*J*1: (a) A.P. Ginsberg J. Am. Chem. Soc. 102 (1980), 111, (b) L. Noodleman J. Chem. Phys. 74 (1981), 5737, (c) L. Noodleman E.R. Davidson Chem. Phys. 109 (1986), 131.

*J*2: A. Bencini D. Gatteschi J. Am. Chem. Soc. 108 (1980), 5763.

*J*3: (a) K. Yamaguchi Y. Takahara T. Fueno in: V.H. Smith (Ed.) Applied Quantum Chemistry. Reidel, Dordrecht (1986), pp 155, (b) T.Soda et al. Chem. Phys. Lett., 319, (2000), 223.

## Heptanuclear {Dy<sub>2</sub>Cu<sub>5</sub>} complex as a single-molecule magnet

Romana Mičová, Cyril Rajnák, Ján Titiš, Ján Moncol', Jana Nováčiková, Alina Bieňko and Roman Boča

---

Cartesian coordinates of fragments corresponding to individual metal centers used for TD-DFT calculations

Fragment of the Cu-4 center:

|    |          |          |          |
|----|----------|----------|----------|
| Br | 12.77000 | 9.81500  | 16.16900 |
| Cu | 12.36700 | 8.38100  | 8.93300  |
| O  | 13.26700 | 9.07100  | 7.34600  |
| O  | 11.38100 | 8.02800  | 10.58200 |
| O  | 9.61000  | 7.74800  | 12.45800 |
| O  | 10.75500 | 7.63000  | 8.08400  |
| N  | 13.92200 | 8.96900  | 9.88800  |
| C  | 14.23500 | 11.23100 | 7.76900  |
| C  | 14.50700 | 9.74400  | 7.66700  |
| H  | 15.16500 | 9.58500  | 6.93200  |
| C  | 15.05200 | 9.13500  | 8.96200  |
| H  | 15.73500 | 9.73200  | 9.35900  |
| H  | 15.47200 | 8.25900  | 8.77500  |
| C  | 14.05500 | 9.19200  | 11.13300 |
| H  | 14.90300 | 9.48000  | 11.44900 |
| C  | 12.97900 | 9.03200  | 12.10100 |
| C  | 13.27000 | 9.42800  | 13.42000 |
| H  | 14.12200 | 9.78900  | 13.63400 |
| C  | 12.32100 | 9.29100  | 14.39100 |
| C  | 11.09000 | 8.75900  | 14.12800 |
| H  | 10.44700 | 8.66600  | 14.82100 |
| C  | 10.79700 | 8.36200  | 12.84300 |
| C  | 11.74200 | 8.46700  | 11.80500 |
| C  | 8.61100  | 7.67200  | 13.51300 |
| H  | 8.43200  | 8.57300  | 13.85900 |
| H  | 7.78300  | 7.29100  | 13.15400 |
| H  | 8.94500  | 7.10500  | 14.23900 |
| H  | 10.50385 | 8.19445  | 7.27239  |
| H  | 9.98492  | 7.63467  | 8.75284  |
| H  | 13.85814 | 11.58961 | 6.83397  |
| H  | 15.14303 | 11.74411 | 8.00796  |
| H  | 13.51175 | 11.40943 | 8.53710  |

Fragment of the Cu-5 center:

|    |          |          |         |
|----|----------|----------|---------|
| Cl | 10.44500 | 10.94200 | 7.84600 |
| Br | 14.29300 | 15.77600 | 1.72700 |
| Cu | 12.28700 | 10.18200 | 6.06400 |
| O  | 10.91400 | 11.74900 | 2.07300 |
| O  | 11.60100 | 11.16800 | 4.51600 |
| O  | 13.26700 | 9.07100  | 7.34600 |
| O  | 11.14900 | 8.73600  | 5.41700 |
| N  | 13.52600 | 11.56700 | 6.53600 |
| C  | 12.23400 | 12.22100 | 3.96900 |
| C  | 11.86700 | 12.57700 | 2.63900 |
| C  | 12.45500 | 13.65100 | 1.98300 |
| H  | 12.18400 | 13.89200 | 1.10500 |
| C  | 13.43400 | 14.35700 | 2.63000 |
| C  | 13.85200 | 14.03700 | 3.89600 |
| H  | 14.53500 | 14.54600 | 4.31700 |
| C  | 13.26300 | 12.94900 | 4.56500 |
| C  | 13.80200 | 12.63100 | 5.86300 |
| H  | 14.40700 | 13.25200 | 6.25200 |
| C  | 14.23500 | 11.23100 | 7.76900 |
| H  | 15.08100 | 11.74100 | 7.83700 |
| H  | 13.67600 | 11.43300 | 8.56100 |
| C  | 14.50700 | 9.74400  | 7.66700 |

**Heptanuclear {Dy<sub>2</sub>Cu<sub>5</sub>} complex as a single-molecule magnet**

Romana Mičová, Cyril Rajnák, Ján Titiš, Ján Moncol', Jana Nováčiková, Alina Bieňko and Roman Boča

|   |          |          |         |
|---|----------|----------|---------|
| H | 15.16500 | 9.58500  | 6.93200 |
| C | 15.05200 | 9.13500  | 8.96200 |
| C | 10.11900 | 12.38000 | 1.02800 |
| H | 9.37000  | 11.79500 | 0.78900 |
| H | 9.77300  | 13.23700 | 1.35500 |
| H | 10.67900 | 12.53300 | 0.23900 |
| H | 14.35352 | 9.30045  | 9.75551 |
| H | 15.98611 | 9.59563  | 9.20726 |
| H | 15.19718 | 8.08338  | 8.82811 |
| H | 10.35937 | 8.61503  | 6.05123 |
| H | 11.68820 | 7.87112  | 5.37655 |

Fragment of the Cu-6 center:

|    |          |          |         |
|----|----------|----------|---------|
| Cu | 9.68300  | 8.51000  | 6.71300 |
| O  | 8.21700  | 8.28400  | 8.00800 |
| O  | 8.61100  | 9.39000  | 5.34200 |
| Cl | 10.44500 | 10.94200 | 7.84600 |
| O  | 11.14900 | 8.73600  | 5.41700 |
| O  | 10.75500 | 7.63000  | 8.08400 |
| Cl | 8.92100  | 6.07800  | 5.58000 |
| H  | 8.20075  | 9.08007  | 8.64551 |
| H  | 8.36220  | 7.42564  | 8.53955 |
| H  | 11.63909 | 9.61012  | 5.60707 |
| H  | 10.76656 | 8.75923  | 4.47169 |
| H  | 8.66470  | 10.40109 | 5.46537 |
| H  | 7.64003  | 9.08856  | 5.42409 |
| H  | 11.18249 | 8.33425  | 8.68541 |
| H  | 11.48538 | 7.07378  | 7.63952 |

Fragment of the Dy center:

|    |          |          |          |
|----|----------|----------|----------|
| Dy | 9.20800  | 7.34600  | 9.97800  |
| Br | 5.07200  | 1.24400  | 11.69900 |
| O  | 8.45200  | 5.27200  | 11.35300 |
| O  | 7.76500  | 5.85300  | 8.90900  |
| O  | 8.21700  | 8.28400  | 8.00800  |
| O  | 7.04400  | 7.83500  | 10.83200 |
| H  | 6.68000  | 8.67000  | 11.03200 |
| H  | 6.36900  | 7.22900  | 11.04300 |
| O  | 10.62900 | 5.44400  | 9.82600  |
| H  | 11.55000 | 5.40600  | 9.95000  |
| H  | 10.38700 | 4.56800  | 9.62500  |
| O  | 9.10500  | 9.70800  | 10.38700 |
| H  | 9.09100  | 10.15700 | 9.61600  |
| H  | 8.33200  | 9.92800  | 10.77200 |
| N  | 5.84000  | 5.45300  | 6.89000  |
| C  | 7.13200  | 4.79900  | 9.45700  |
| C  | 7.49900  | 4.44300  | 10.78600 |
| C  | 6.91100  | 3.36900  | 11.44300 |
| H  | 7.18200  | 3.12900  | 12.32000 |
| C  | 5.93200  | 2.66300  | 10.79600 |
| C  | 5.51400  | 2.98300  | 9.53000  |
| H  | 4.83100  | 2.47400  | 9.10800  |
| C  | 6.10300  | 4.07100  | 8.86100  |
| C  | 5.56300  | 4.38900  | 7.56300  |
| H  | 4.95900  | 3.76800  | 7.17300  |
| C  | 5.13100  | 5.78900  | 5.65600  |
| C  | 9.24700  | 4.64000  | 12.39700 |
| H  | 9.99600  | 5.22500  | 12.63600 |
| H  | 9.59300  | 3.78300  | 12.07100 |

## Heptanuclear {Dy<sub>2</sub>Cu<sub>5</sub>} complex as a single-molecule magnet

Romana Mičová, Cyril Rajnák, Ján Titiš, Ján Moncol', Jana Nováčiková, Alina Bieňko and Roman Boča

|    |          |          |          |
|----|----------|----------|----------|
| H  | 8.68700  | 4.48700  | 13.18700 |
| Br | 12.77000 | 9.81500  | 16.16900 |
| O  | 11.38100 | 8.02800  | 10.58200 |
| O  | 9.61000  | 7.74800  | 12.45800 |
| O  | 10.75500 | 7.63000  | 8.08400  |
| N  | 13.92200 | 8.96900  | 9.88800  |
| C  | 15.05200 | 9.13500  | 8.96200  |
| C  | 14.05500 | 9.19200  | 11.13300 |
| H  | 14.90300 | 9.48000  | 11.44900 |
| C  | 12.97900 | 9.03200  | 12.10100 |
| C  | 13.27000 | 9.42800  | 13.42000 |
| H  | 14.12200 | 9.78900  | 13.63400 |
| C  | 12.32100 | 9.29100  | 14.39100 |
| C  | 11.09000 | 8.75900  | 14.12800 |
| H  | 10.44700 | 8.66600  | 14.82100 |
| C  | 10.79700 | 8.36200  | 12.84300 |
| C  | 11.74200 | 8.46700  | 11.80500 |
| C  | 8.61100  | 7.67200  | 13.51300 |
| H  | 8.43200  | 8.57300  | 13.85900 |
| H  | 7.78300  | 7.29100  | 13.15400 |
| H  | 8.94500  | 7.10500  | 14.23900 |
| H  | 14.73545 | 8.90004  | 7.96727  |
| H  | 15.84684 | 8.47818  | 9.24786  |
| H  | 15.39603 | 10.14758 | 8.99700  |
| H  | 5.51549  | 6.70664  | 5.26230  |
| H  | 4.08708  | 5.89941  | 5.86320  |
| H  | 5.27164  | 5.00680  | 4.93956  |
| H  | 7.22848  | 8.46804  | 8.17931  |
| H  | 8.31126  | 7.62650  | 7.23392  |
| H  | 10.27924 | 7.38253  | 7.21635  |
| H  | 11.56490 | 7.02344  | 8.21261  |
